# Supplementary material
Source: Springer Nature journal article supplement (https://www.springermedizin.de/resource/supplementary/12889_2007_974_MOESM2_ESM.pdf/9503054)

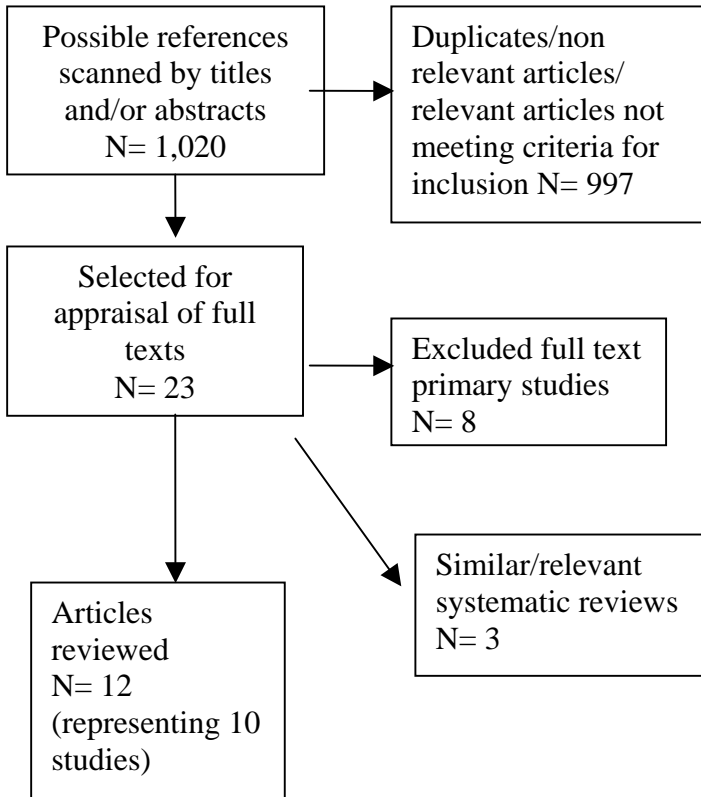

Key: N is number of studies included at that level

Supplement: MOESM2 [file 9503054]
